# Supplementary material for: Investigating Potential Inhibitory Effect of Uncaria tomentosa (Cat's Claw) against the Main Protease 3CLpro of SARS-CoV-2 by Molecular Modeling
Source: PubMed Central journal article supplement (PMC7532411; doi:10.1155/2020/4932572), 2020-09-30
Supplement: 4932572.f1.pdf [file 4932572.f1.pdf]

Supplementary Materials

## **Investigating Potential Inhibitory Effect of *Uncaria tomentosa* (Cat's claw) against the Main Protease 3CL<sup>Pro</sup> of SARS-CoV-2 by Molecular Modeling**

**Andres F. Yepes-Pérez<sup>1\*</sup>, Oscar Herrera-Calderon<sup>2\*</sup>, José-Emilio Sánchez-Aparicio<sup>3</sup>, Laura Tiessler-Sala<sup>3</sup>, Jean-Didier Maréchal<sup>3</sup>, Wilson Cardona-G<sup>1</sup>**

1 Chemistry of Colombian Plants, Institute of Chemistry, Faculty of Exact and Natural Sciences University of Antioquia-UdeA, Calle 70 No. 52-21, A.A 1226, Medellin, Colombia; andresf.yepes@udea.edu.co (A.F.Y.-P.); wilson.cardona1@udea.edu.co (W.C.G.).

2 Academic Department of Pharmacology, Bromatology and Toxicology, Faculty of Pharmacy and Biochemistry, Universidad Nacional Mayor de San Marcos, Jr Puno 1002. Lima 15001, Peru; oherreraca@unmsm.edu.pe (O.H.-C.)

3 Insilichem, Departament de Química, Universitat Autònoma de Barcelona, Edifici C.n., 08193 Cerdanyola del Vallés, Barcelona, Spain; JeanDidier.Marechal@uab.cat (J.-D.M.); laura.tiessler@uab.cat (L.T.S.); joseemilio.sanchez@uab.cat (J.-E.S.-A.).

\* Correspondence should be addressed to Andres F. Yepes-Pérez; andresf.yepes@udea.edu.co and Oscar Herrera-Calderon; oherreraca@unmsm.edu.pe

## 1. Supplementary figures

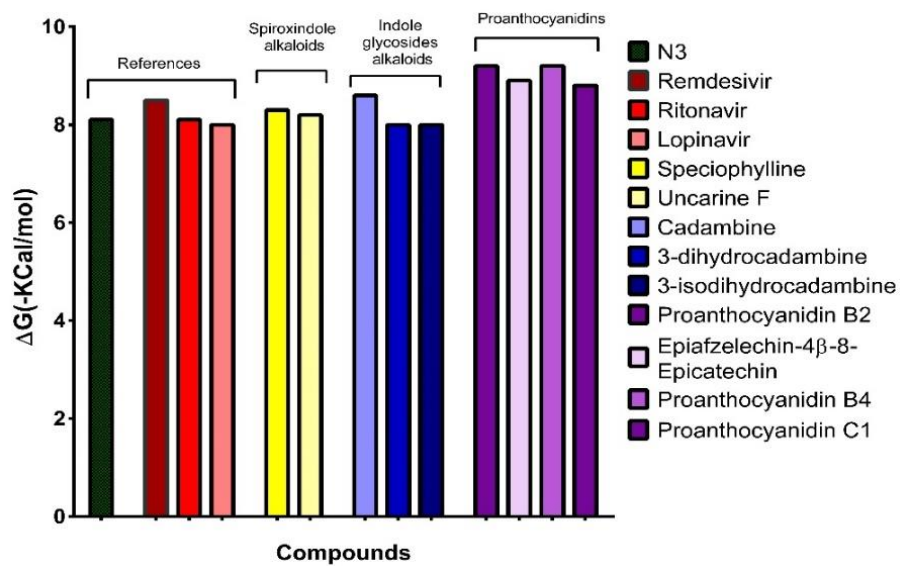

**Figure S1.** Histogram showing molecular docking results between the novel SARS-CoV-2 main protease and nine components from cat's claw which showed the highest binding affinity.

**spiroindole alkaloids**

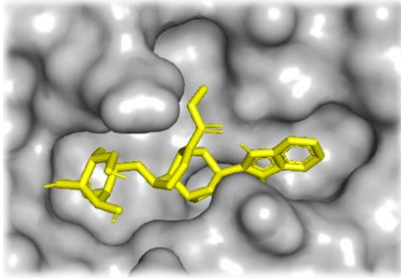

**Spirophylline**

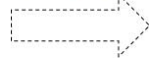

$\Delta G = -8.1 \text{ Kcal.mol}^{-1}$

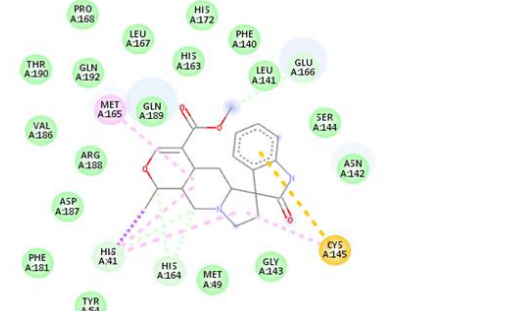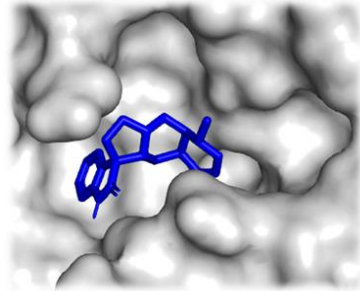

**Uncarine F**

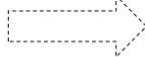

$\Delta G = -8.2 \text{ Kcal.mol}^{-1}$

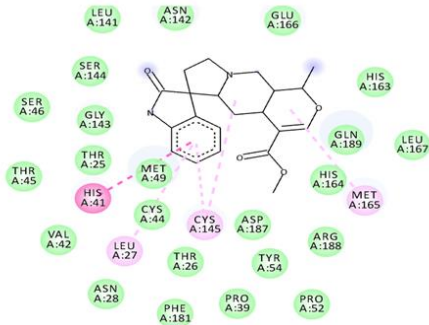

**Indole glycosides alkaloids**

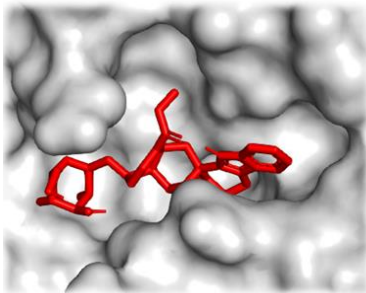

**Cadambine**

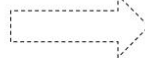

$\Delta G = -8.6 \text{ Kcal.mol}^{-1}$

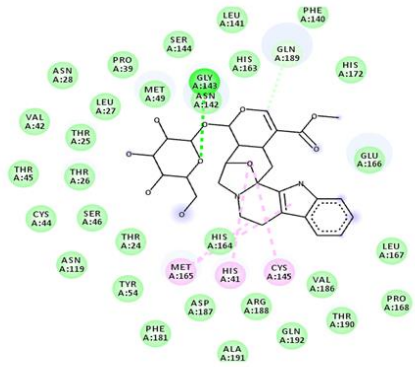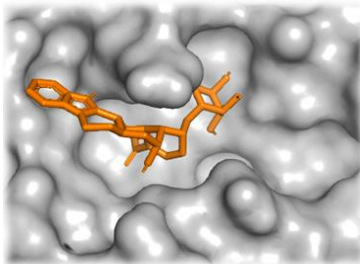

**3-dihydrocadambine**

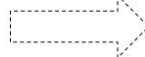

$\Delta G = -8.0 \text{ Kcal.mol}^{-1}$

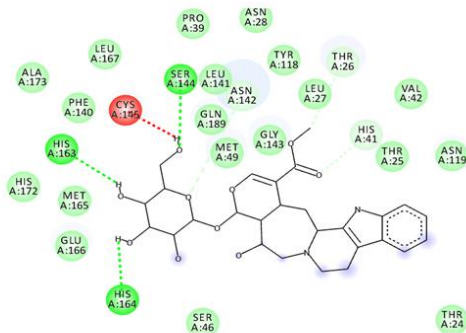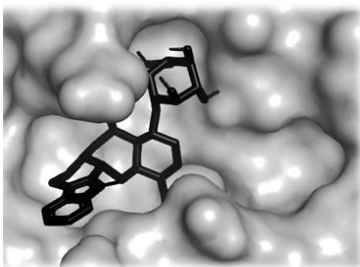

**3-isodihydrocadambine**

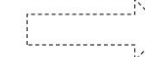

$\Delta G = -8.0 \text{ Kcal.mol}^{-1}$

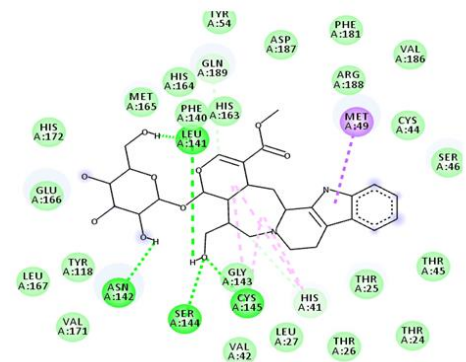

## Proanthocyanidins

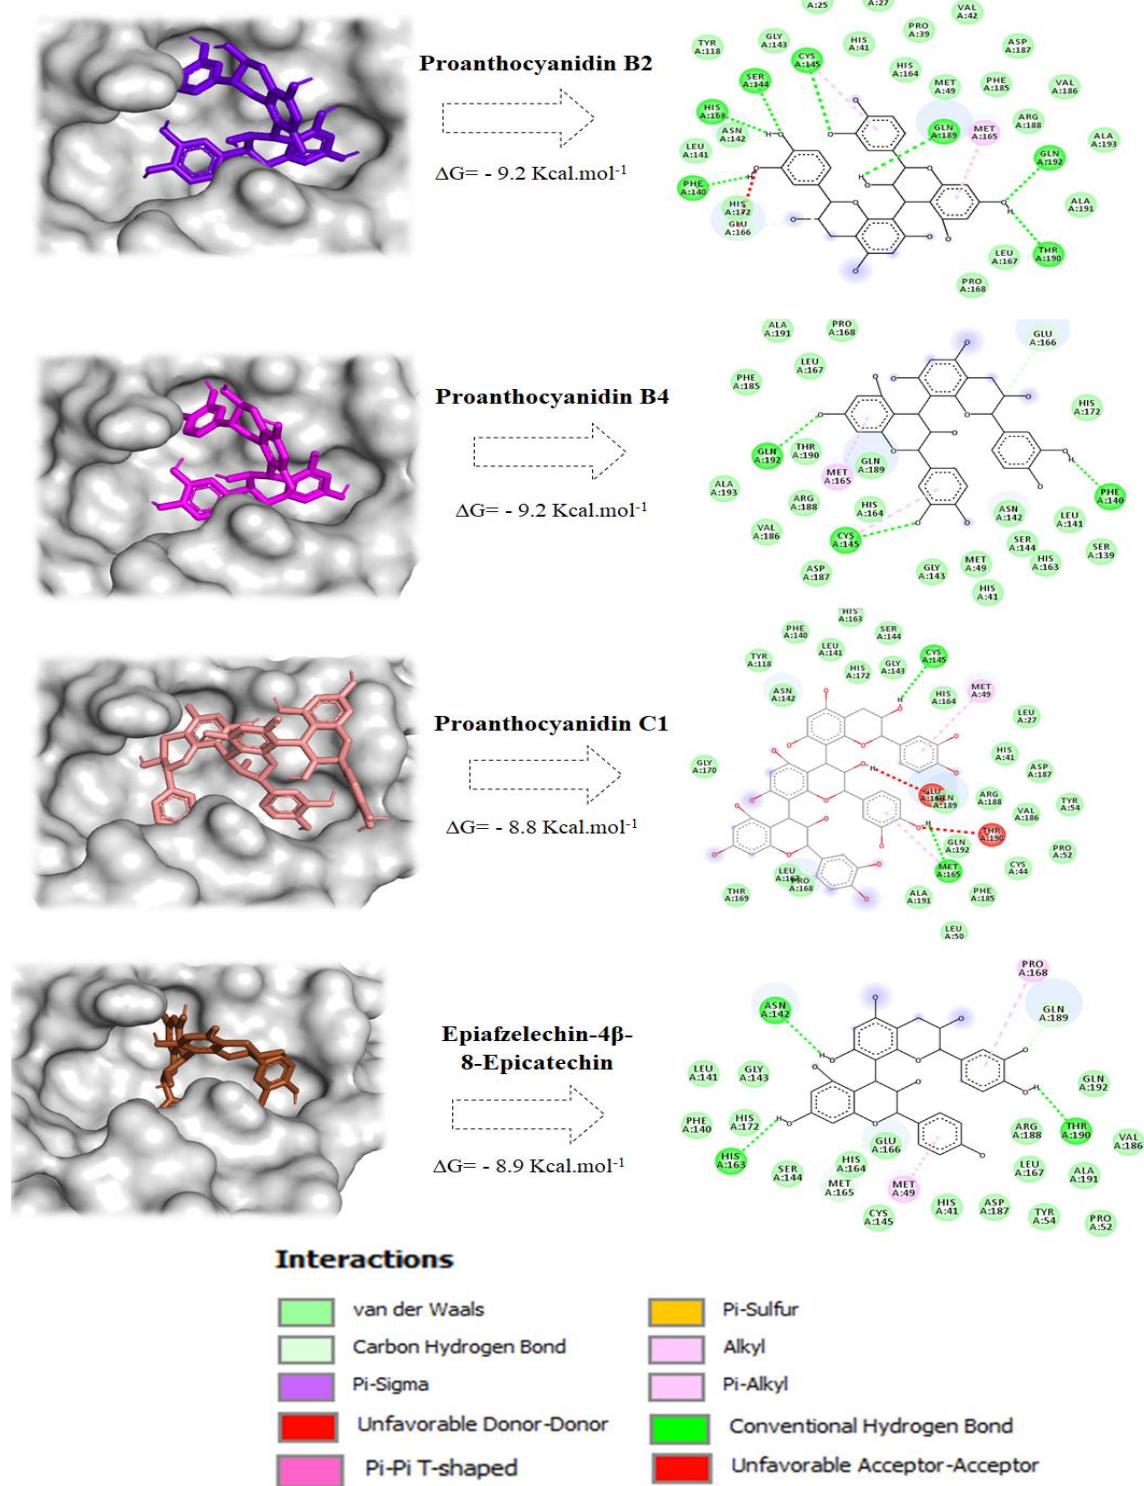

**Figure S2.** (A) The best conformation of the nine active components against 3CL<sup>Pro</sup> within catalytic pocket of SARS-CoV-2 main protease 3CL<sup>Pro</sup> (PDB: 6LU7). 2D interaction modes plots between the selected compounds with 3CL<sup>Pro</sup>. Interactions between each component and amino acid residues into 3CL<sup>Pro</sup> cleavage domain are indicated by the dashed lines.

Figure S2 illustrates 3D and 2D representations into the cleavage site on 3CL<sup>Pro</sup> enzyme for the compounds which exhibited the highest docking score (Speciophylline, Uncarine F, Cadambine, 3-dihydrocadambine, 3-isodihydrocadambine, Proanthocyanidin B2, Epiafzelechin-4 $\beta$ -8-Epicatechin and Proanthocyanidin B4). We examined which interactions are involved when these compounds were docked against 3CL<sup>Pro</sup> and how their structures affect them. Hence, those compounds having the better dock to protease on each series was selected for this analysis as follow: Speciophylline (for spiroindoles series), Cadambine (for indole glycosides series) and Proanthocyanidin B2 (for Proanthocyanidins series). Thus, Speciophylline exhibits a good docking score for 3CL<sup>Pro</sup> (-8.1 kcal/mol) when compared to the inhibitor N3. Speciophylline has  $\pi$ - $\pi$  stacking interactions with CYS145 and MET165 residues. In addition, hydrophobic interactions between the molecule and the HIS164, HIS41, LEU141, GLN189, GLY143, GLU166 residues were observed. On the other hand, the docking score of Cadambine (-8.6 kcal/mol) was better than to the inhibitor N3. Cadambine showed a strong hydrogen bond interaction between the oxygen in pyran moiety with GLY143 residue. In addition, three  $\pi$ -stacking contacts were formed the molecule and the MET165, HIS41, CYS145 residues. Several hydrophobic interactions between Cadambine and MET49, GLU166, ASN142, GLN189 were also observed. Proanthocyanidin B2 was found to best bind with SARS-CoV-2 main protease (binding energy -9.2 kcal/mol) exhibiting highest 3CL<sup>Pro</sup> affinity than inhibitor N3 or FDA approved antiviral drugs, respectively. Their high affinity is consequence of Proanthocyanidin B2 displayed seven hydrogen bonding interactions with key aminoacids CYS145, SER144, HIS163, PHE140, GLN189, GLN192 and THR190 into the catalytic domain of 3CL<sup>Pro</sup>, one  $\pi$ -stacking contact with MET165 and hydrophobic interactions formed between the molecule and ASN142, HIS172, GLU166, HIS41. As aforementioned, recent reports revealed the specific biological role of proanthocyanidins for the potential treatments of various antiviral infections.

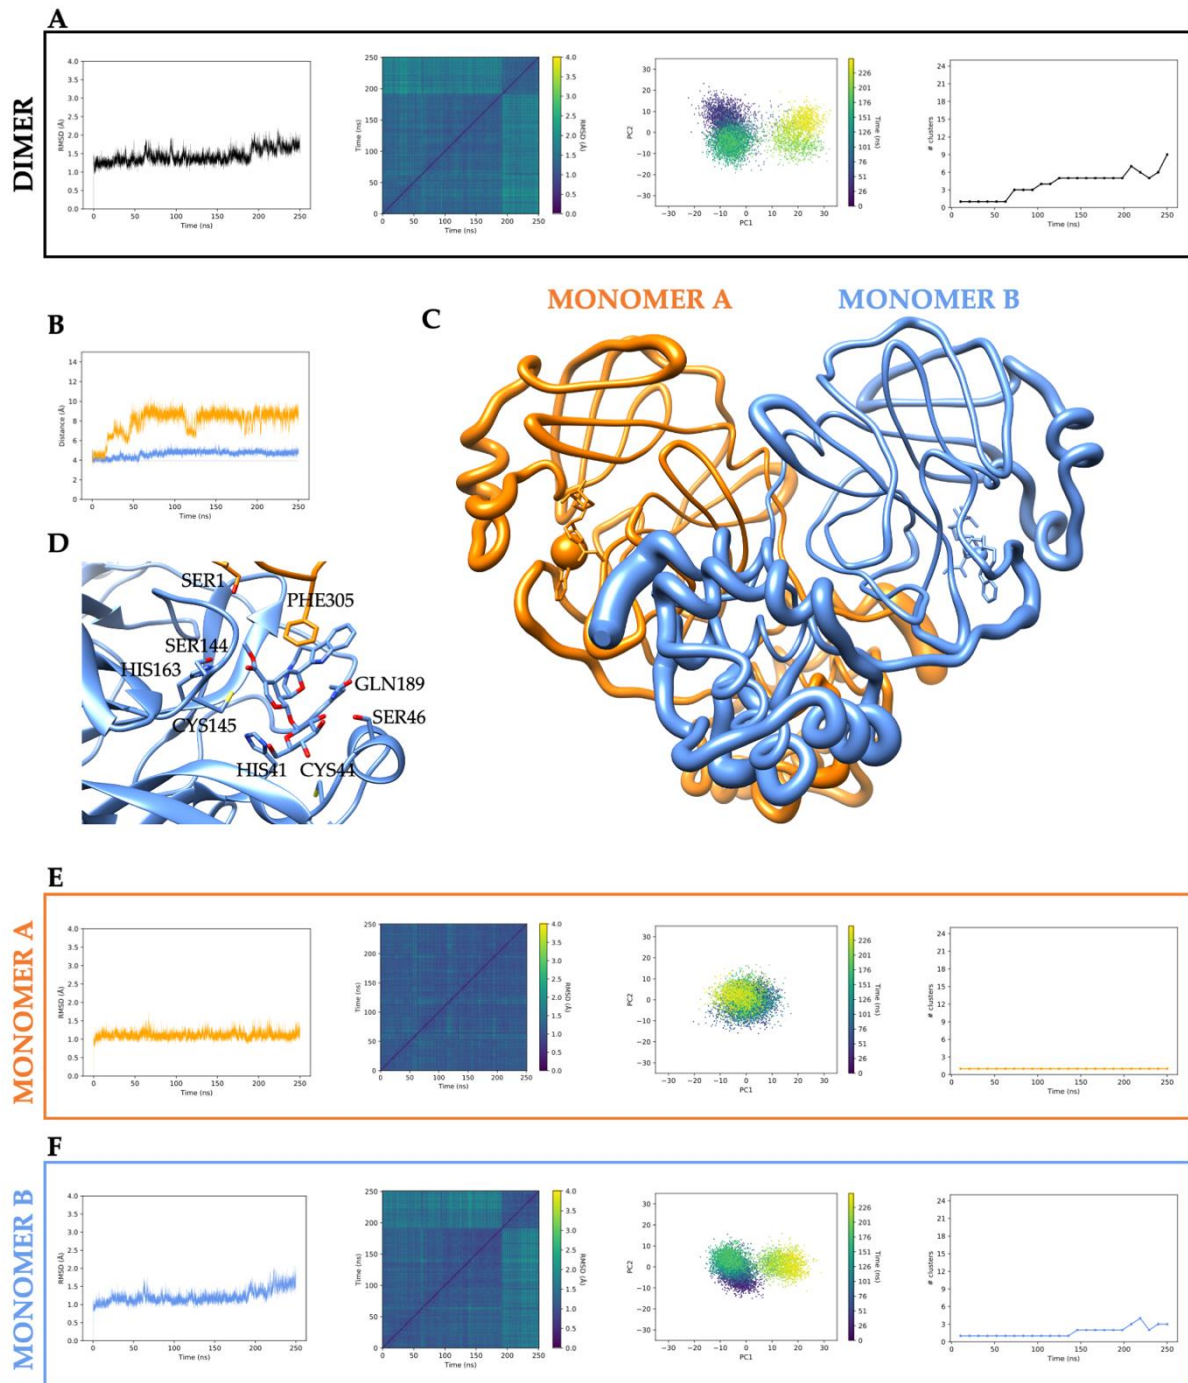

**Figure S3.** Complete analysis of the 250ns trajectory of 3CL<sup>Pro</sup> of SARS-CoV-2 bound with Cadambine. Orange color reports to the monomer A and blue to monomer B. Panels A, E and F, contains, from left to right: RMSD, all-to-all RMSD, PCA and cluster counting (cutoff 1,5Å). Panel B shows the relative position of Cadambine molecules versus the center of mass of the S1 cavity along the simulation (black dashed line indicates the distance of N3 inhibitor as reference). For panel C, size of the ribbon is proportional to the flexibility of the protein backbone and the size on the ligand center is proportional to the amount of structural deviation of the ligand during the 250ns. Panel D reproduces the binding site S1 with the most important residues involved in the interactions.

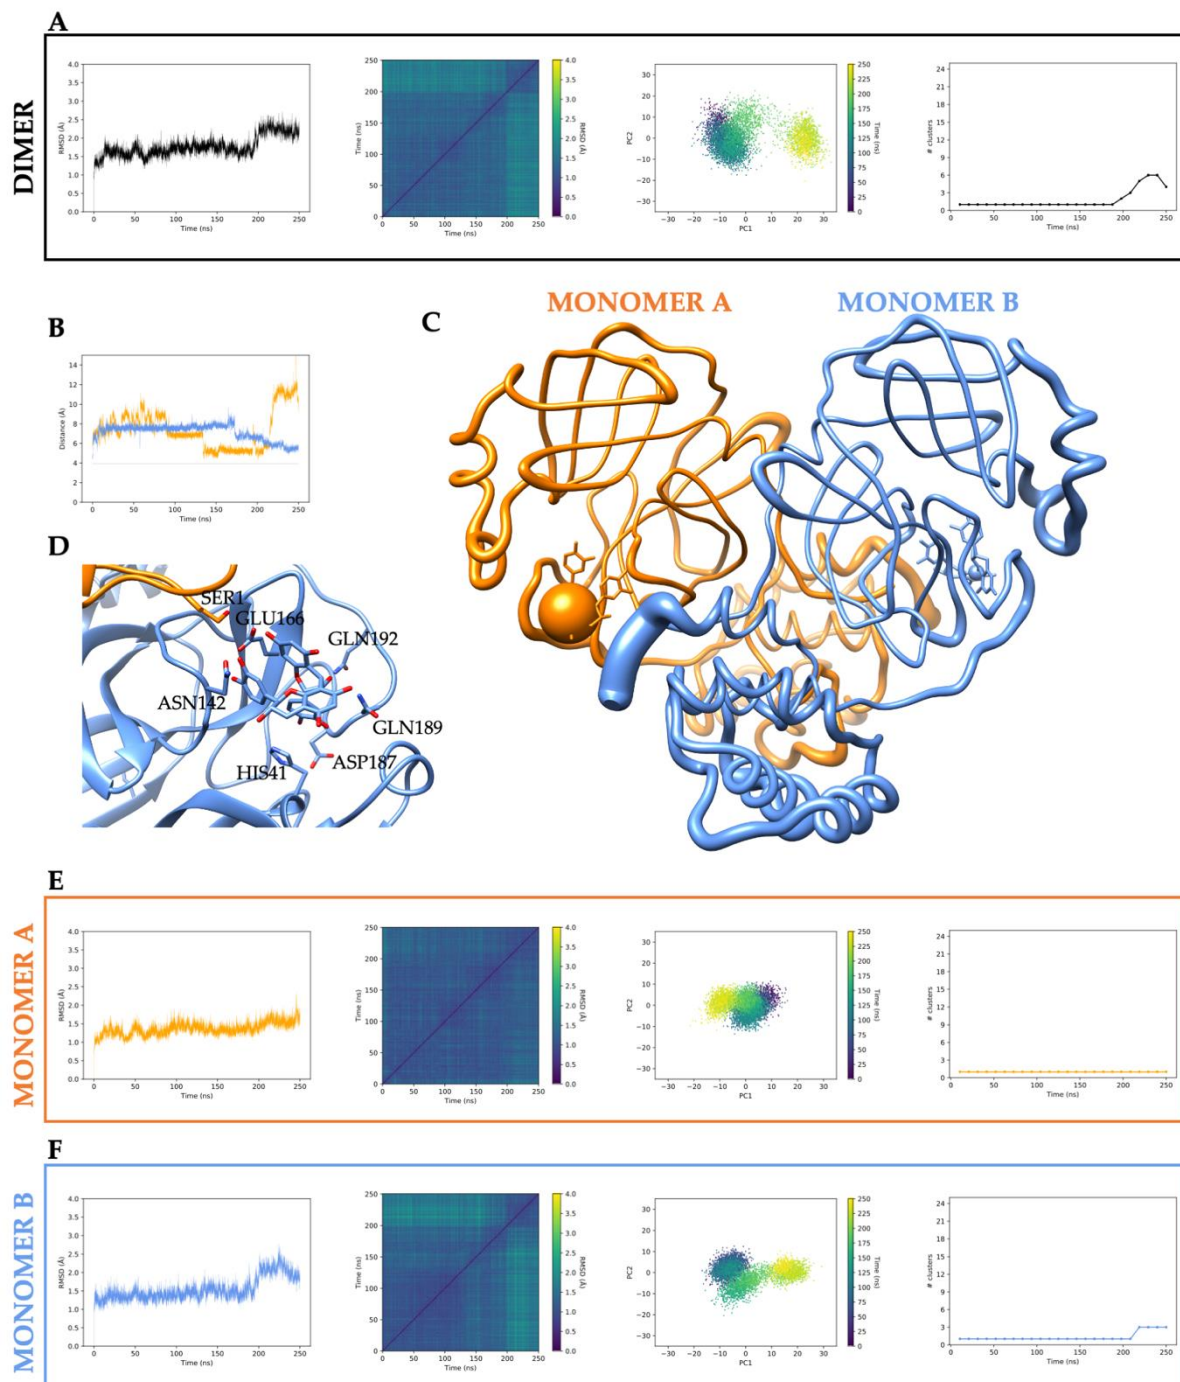

**Figure S4.** Complete analysis of the 250ns trajectory of 3CL<sup>Pro</sup> of SARS-CoV-2 bound with Proanthocyanidin B2. Orange color reports to the monomer A and blue to monomer B. Panels A, E and F, contains, from left to right: RMSD, all-to-all RMSD, PCA and cluster counting (cutoff 1,5Å). Panel B shows the relative position of Proanthocyanidin B2 molecules versus the center of mass of the S1 cavity along the simulation (black dashed line indicates the distance of N3 inhibitor as reference). For panel C, size of the ribbon is proportional to the flexibility of the protein backbone and the size on the ligand center is proportional to the amount of structural deviation of the ligand during the 250ns. Panel D reproduces the binding site S1 with the most important residues involved in the interactions.

## 2. Supplementary tables

**Table S1.** GPathFinder vina barriers for the ligand route. 120 solutions were obtained for each ligand. Average and standard deviation are reported.

| Ligand              | Vina barrier average (kcal/mol) |
|---------------------|---------------------------------|
| Cadambine           | 4.31 ± 2.85                     |
| Proanthocyanidin B2 | 5.31 ± 3.17                     |
| Spheciophylline     | 2.38 ± 2.91                     |

**Table S2.** Amino acids of the 3CL<sup>Pro</sup> protease that participate in hydrogen bonding interactions with Cadambine, Proanthocyanidin B2 and Speciophylline.

| Cadambine |                                                     |                                                    |
|-----------|-----------------------------------------------------|----------------------------------------------------|
| Time      | Ligand 1 (Monomer A)                                | Ligand 2 (Monomer B)                               |
| 10ns      | THR24, THR26, SER46, GLY143, SER144, CYS145, GLN189 | THR26, GLY143, SER144, GLN189                      |
| 50ns      | GLU47, GLN189                                       | THR26                                              |
| 100ns     | GLU47, GLN189                                       | THR26, CYS44, SER46, GLY143, SER144, GLN189        |
| 120ns     | GLU47, GLN189                                       | THR26, HIS41, CYS44, SER46, GLY143, SER144, GLN189 |
| 200ns     | GLU47, GLN189                                       | THR26, HIS41, CYS44, SER46, GLY143, SER144, GLN189 |
| 250ns     | SER46, GLU47, GLN189                                | THR26, CYS44, GLY143, SER144, GLN189, GLN306       |

| Proanthocyanidin B2 |                                                                              |                                                        |
|---------------------|------------------------------------------------------------------------------|--------------------------------------------------------|
| Time                | Ligand 1 (Monomer A)                                                         | Ligand 2 (Monomer B)                                   |
| 20ns                | SER46, GLU166                                                                | SER1, ASN142, GLU166, GLN189                           |
| 50ns                | SER46, GLU166, GLN189                                                        | SER1, ASN142, GLU166                                   |
| 75ns                | SER46, GLU47, ASN142, GLU166, GLN189                                         | SER1, GLU166                                           |
| 125ns               | THR25, CYS145, HIS164, GLU166, GLN189                                        | PHE140, GLU166, GLN189                                 |
| 165ns               | SER46, MET49, LEU141, ASN142, SER144, CYS145, HIS164, GLU166, ASP187, GLN189 | PHE140, GLU166                                         |
| 230ns               | GLU166, GLN189                                                               | GLY143, HIS163, HIS163, HIS164, GLU166, ASP187, GLN189 |

| Speciophylline |                        |                                |
|----------------|------------------------|--------------------------------|
| Time           | Ligand 1 (Monomer A)   | Ligand 2 (Monomer B)           |
| 20ns           | GLN189, GLN192         | GLN189, GLN192                 |
| 45ns           | GLN189, GLN192         | GLN189, GLN192                 |
| 80ns           | ASN142, GLN192         | GLN192                         |
| 125ns          | GLN189, GLN192         | GLN192                         |
| 165ns          | GLN189, GLN192         | ARG188, GLN189, THR190, GLN192 |
| 230ns          | GLN189, THR190, GLN192 | GLN189, GLN192                 |



### 3. Input file (.yaml format) used in GpathFinder calculations

```
ga:          # Section to configure the Genetic Algorithm parameters
  mut_pb: 0.8
  cx_pb: 0.2
  mut_indpb: 1
  generations: 750
  population: 12
genes:       # Section to configure the genes
- module: gpath.genes.molecule
  name: Ligand
  path: ./structures/cadambine_pose01.mol2
- module: gpath.genes.molecule
  name: Protein
  path: ./structures/protein
  first_frame: ./structures/protein/representative_1.pdb
- module: gpath.genes.path_torsion
  name: T
  target: Ligand
  anchor: Ligand/3
- module: gpath.genes.path
  name: Pathway
  ligand: Ligand
  protein: Protein
  torsion_gene: T
  min_step_increment: 0.5
  max_step_separation: 1.5
objectives:  # Section to configure the evaluation of the pathways
- module: gpath.objectives.path_scoring
  name: Clashes
  probe: Pathway
  which: clashes
  method: average
  weight: -1.0
- module: gpath.objectives.path_scoring
  name: Vina
  probe: Pathway
  which: vina
  method: average
  weight: -1.0
output:
  check_every: 0
  name: cadambine_pose01_00
  pareto: False
  path: ./cadambine_pose01_00
similarity:
  args:
  - Pathway
  - 1.0
  kwargs: {}
  module: gpath.path_similarity.pathways_rmsd

# Input file used with GPathFinder version 1.2.1
```
